# Supplementary material for: Asparagine modified downconversion NaGdF4:Dy3+/Tb3+ nanophosphor for selective and sensitive detection of Cu(ii) ion
Source: Royal Society of Chemistry journal article supplement (doi:10.1039/d1nj02685b), 2021-01-01
Supplement: d1nj02685b1.pdf [file d1nj02685b1.pdf]

## **Asparagine Modified Downconversion NaGdF<sub>4</sub>:Dy<sup>3+</sup>/Tb<sup>3+</sup> Nanophosphor for Selective and Sensitive Detection of Cu (II) Ion**

Lobzang Tashi<sup>a</sup>, Richa Singhaal<sup>a</sup>, Zaib ul Nisa<sup>a</sup>, Swaita Devi<sup>a</sup>, Haq Nawaz Sheikh<sup>a\*</sup>

<sup>a</sup>Department of Chemistry, University of Jammu, Baba Sahib Ambedkar Road, Jammu-180006, India

[hnsheikh@rediffmail.com](mailto:hnsheikh@rediffmail.com)

### **(Supplementary Information)**

#### **Table of Contents**

| <b>CONTENTS</b>                                                                                                                                                                       | <b>Pages</b>  |
|---------------------------------------------------------------------------------------------------------------------------------------------------------------------------------------|---------------|
| 1. EDS.....                                                                                                                                                                           | <b>S2-S3</b>  |
| 2. FT-IR spectra.....                                                                                                                                                                 | <b>S4-S5</b>  |
| 3. Life time decay curve.....                                                                                                                                                         | <b>S6</b>     |
| 4. quenching efficiency.....                                                                                                                                                          | <b>S7</b>     |
| 5. PL spectra of Asp-NP in presence of different metal ions (Co <sup>2+</sup> , Hg <sup>2+</sup> , Zn <sup>2+</sup> , Mn <sup>2+</sup> , Ni <sup>2+</sup> and Cu <sup>2+</sup> )..... | <b>S8-S13</b> |

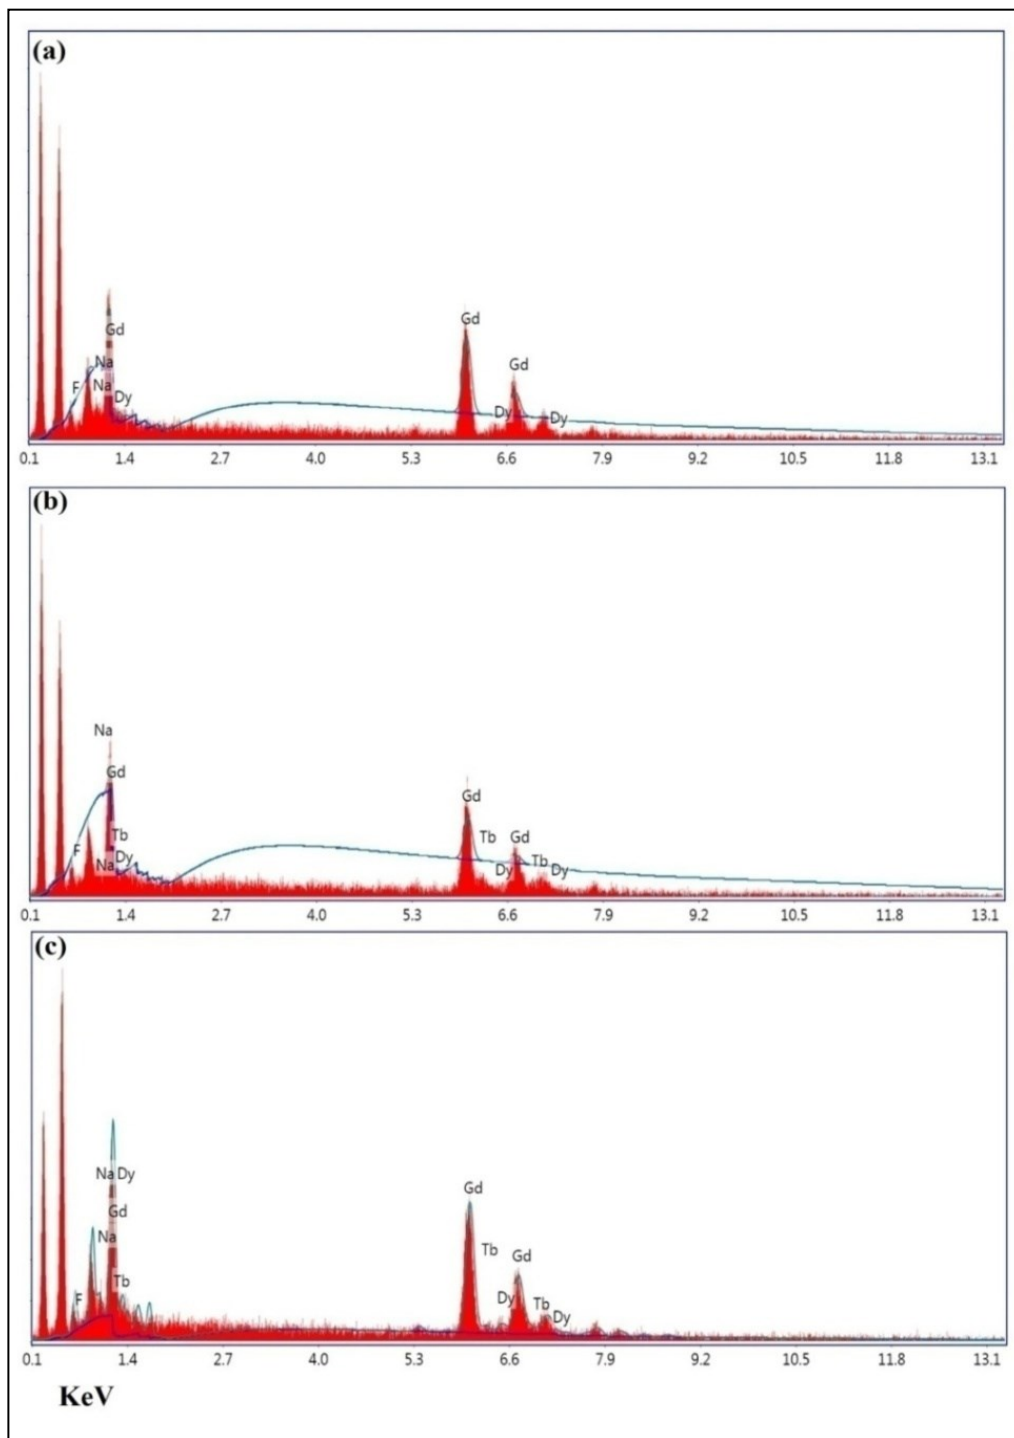

**Fig. S1** EDS spectra of (a)  $\text{Dy}^{3+}$  doped  $\text{NaGdF}_4$  and  $\text{Dy}^{3+}/\text{Tb}^{3+}$  co-doped  $\text{NaGdF}_4$  nanophosphors with different  $\text{Tb}^{3+}$  contents; (b) 3%. (c) 5% and (d) 10%.

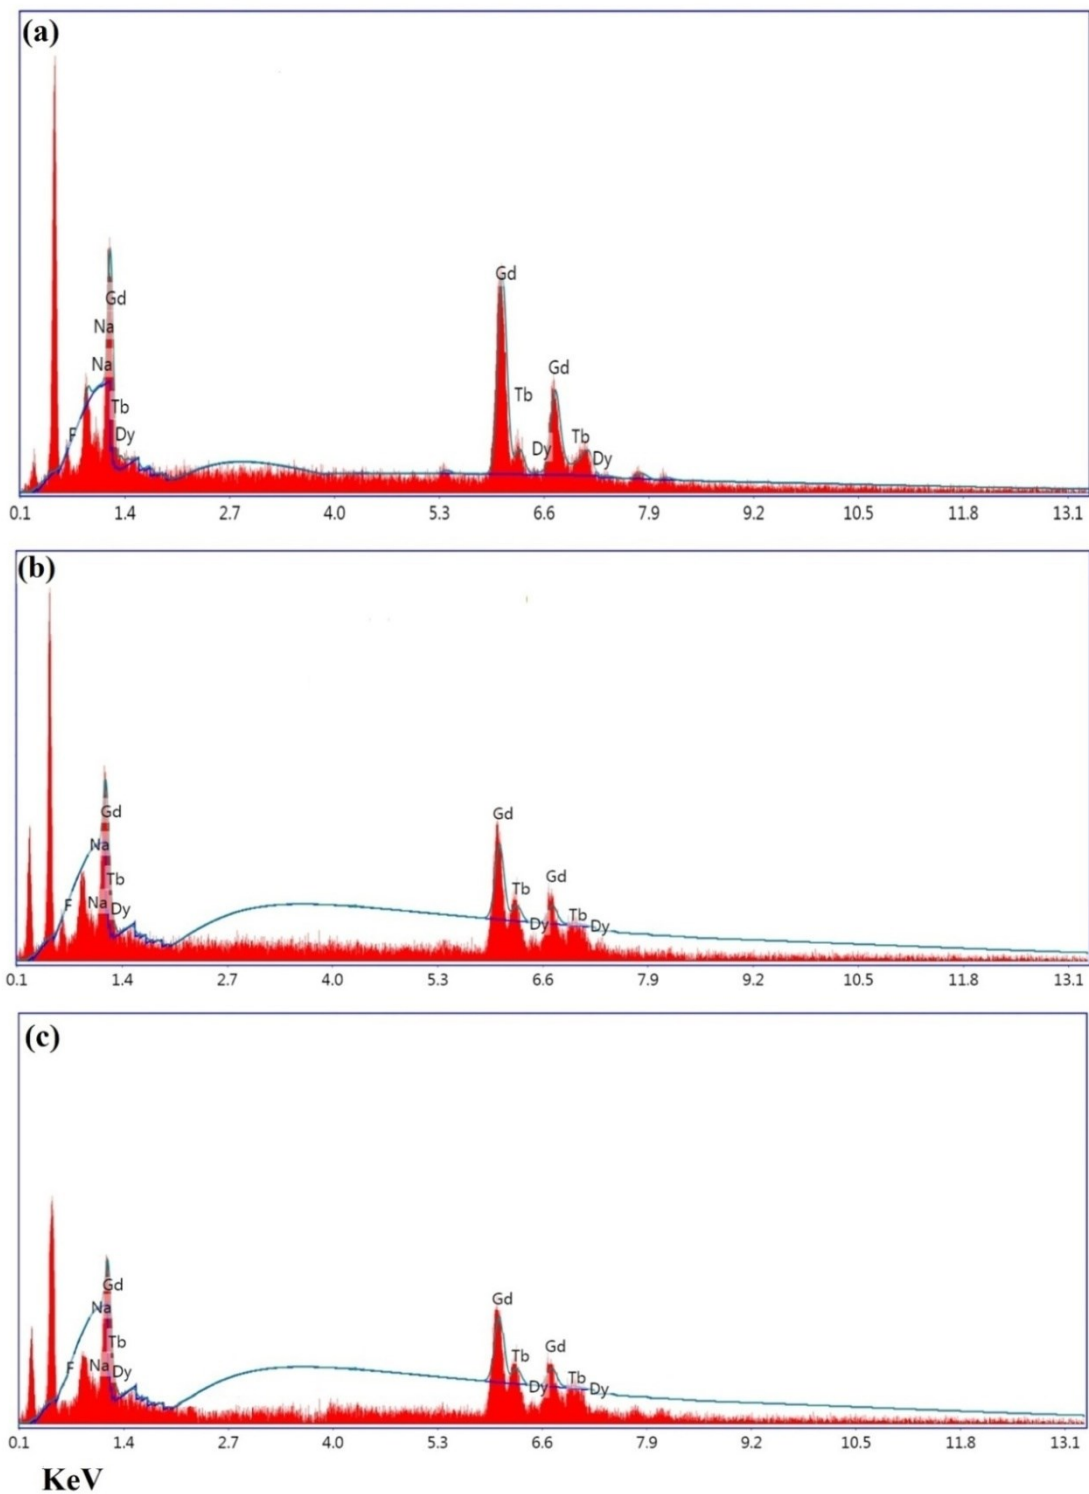

**Fig. S2** EDS spectra of Dy<sup>3+</sup>/Tb<sup>3+</sup> co-doped NaGdF<sub>4</sub> nanophosphors with different Tb<sup>3+</sup> contents; (a) 10%, (b) 15% and (c) 20%.

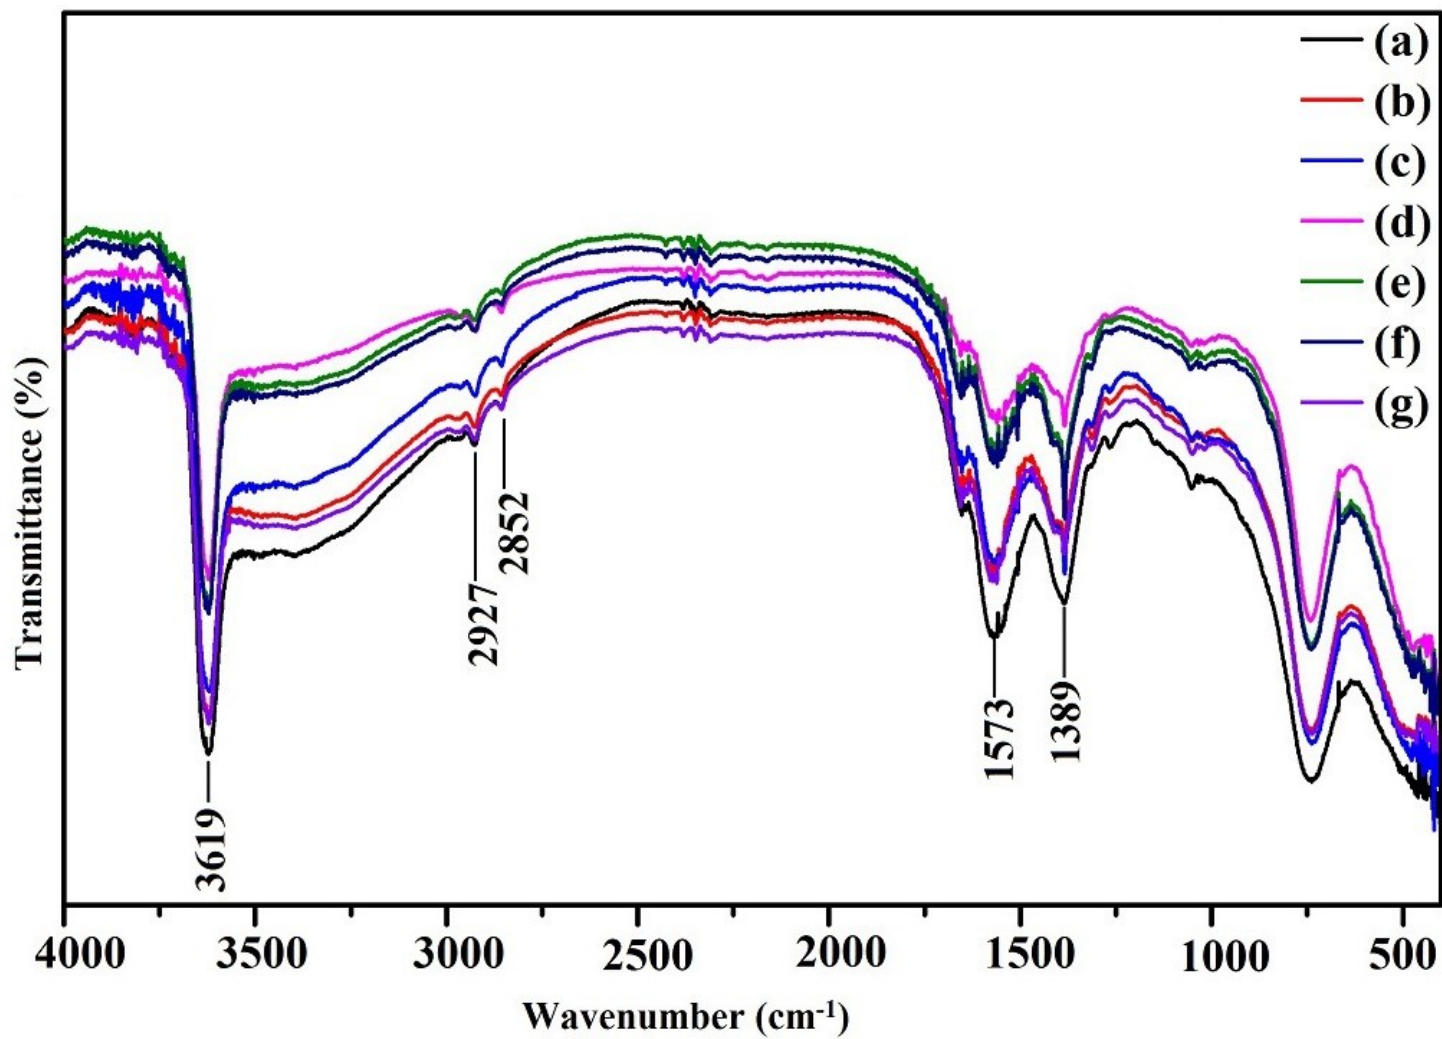

**Fig. S3** FTIR spectra of synthesized nanomaterials (a) NaGF<sub>4</sub>, (b) NaGF<sub>4</sub>:Dy<sup>3+</sup> and (c-g) NaGF<sub>4</sub>:Dy<sup>3+</sup>/Tb<sup>3+</sup> with different Tb<sup>3+</sup> contents; (c) 3%, (d) 5%, (e) 10%, (f) 15% and (g) 20%.

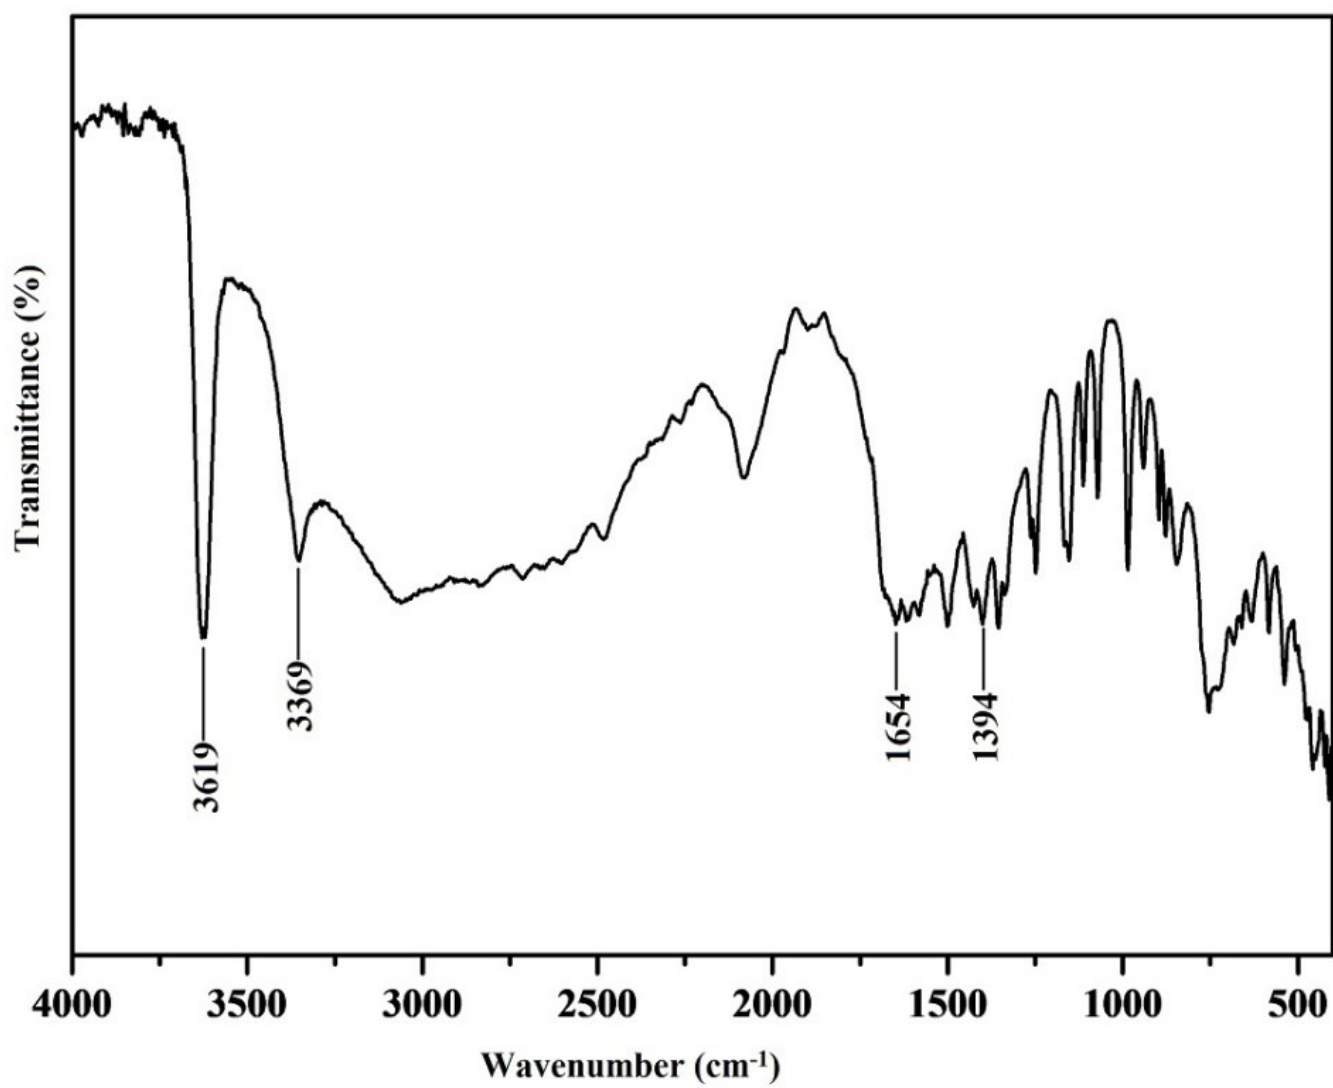

**Fig. S4** FTIR spectra of NaGF<sub>4</sub>:Dy<sup>3+</sup>/Tb<sup>3+</sup> nanophosphor functionalized with asparagine amino acid.

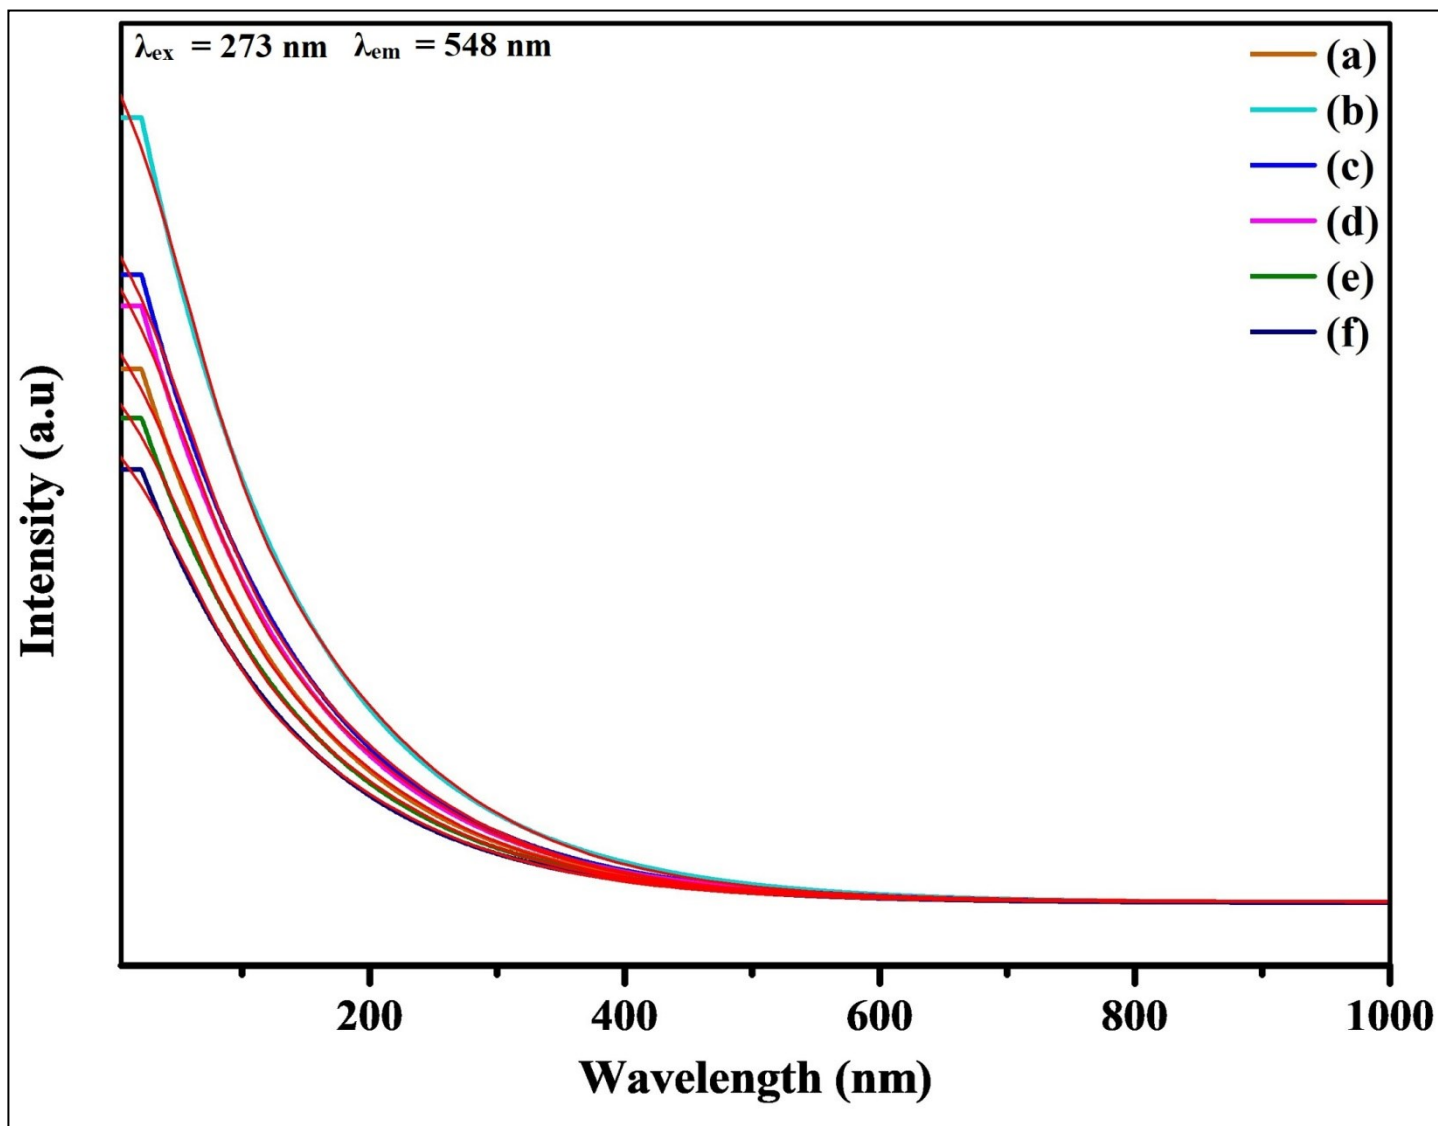

**Fig. S5** Photoluminescence decay curves of (a)  $\text{NaGdF}_4:\text{Dy}^{3+}$  and (b-f)  $\text{NaGdF}_4:\text{Dy}^{3+}/\text{Tb}^{3+}$  with different  $\text{Tb}^{3+}$  contents; (b) 3%, (c) 5%, (d) 10%, (e) 15% and (f) 20%.

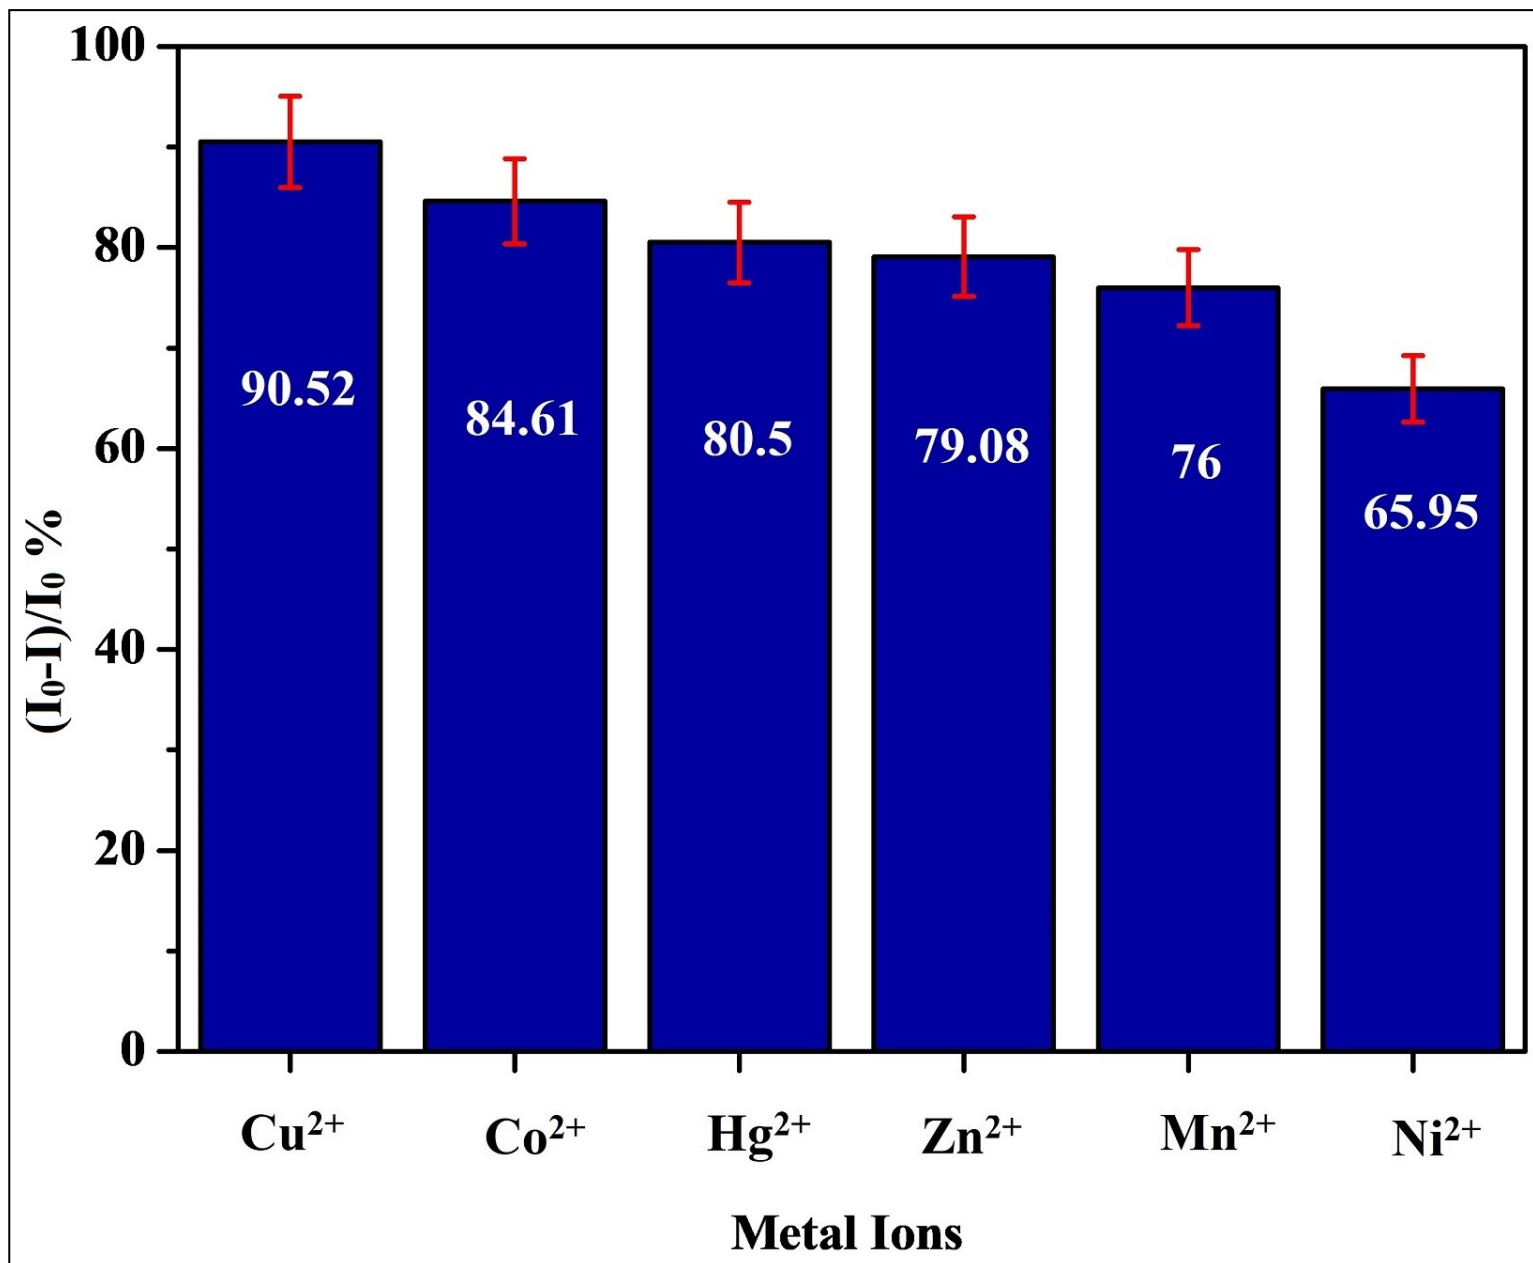

**Fig. S6** Quenching efficiency of the nanostructure Aap-NP and different heavy metal ions (100 ppm) in aqueous solution.

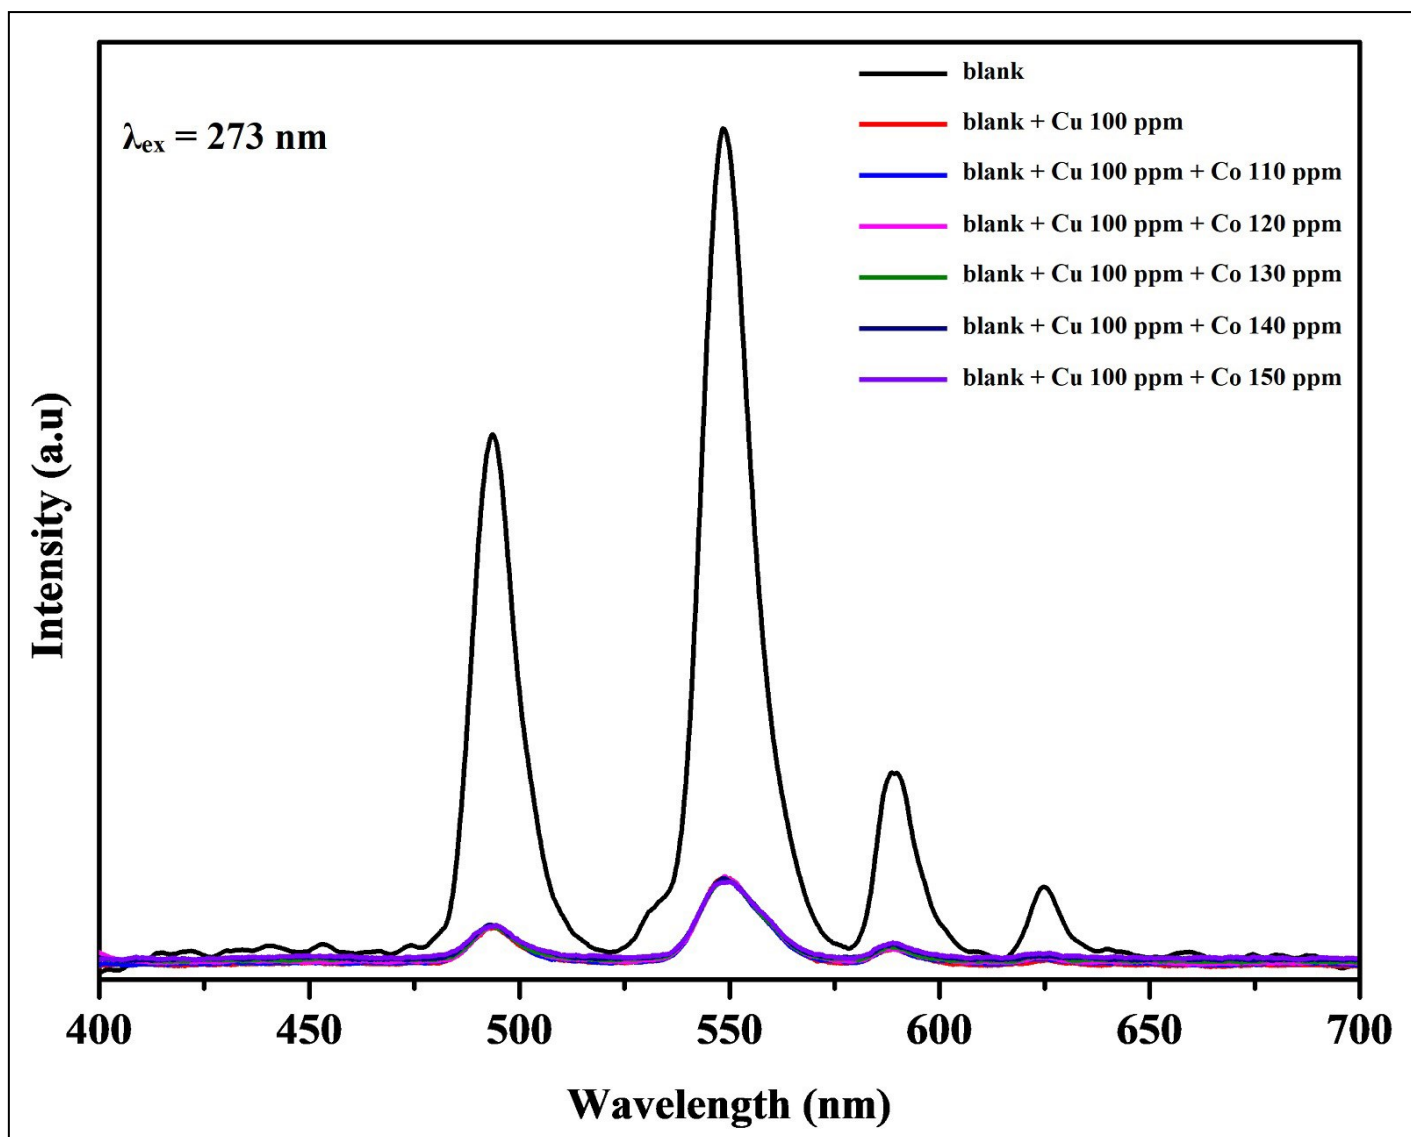

**Fig. S7** Photoluminescence spectra of Asp-NP after the addition of Cu<sup>2+</sup> ion along with different concentrations of Co<sup>2+</sup> ion.



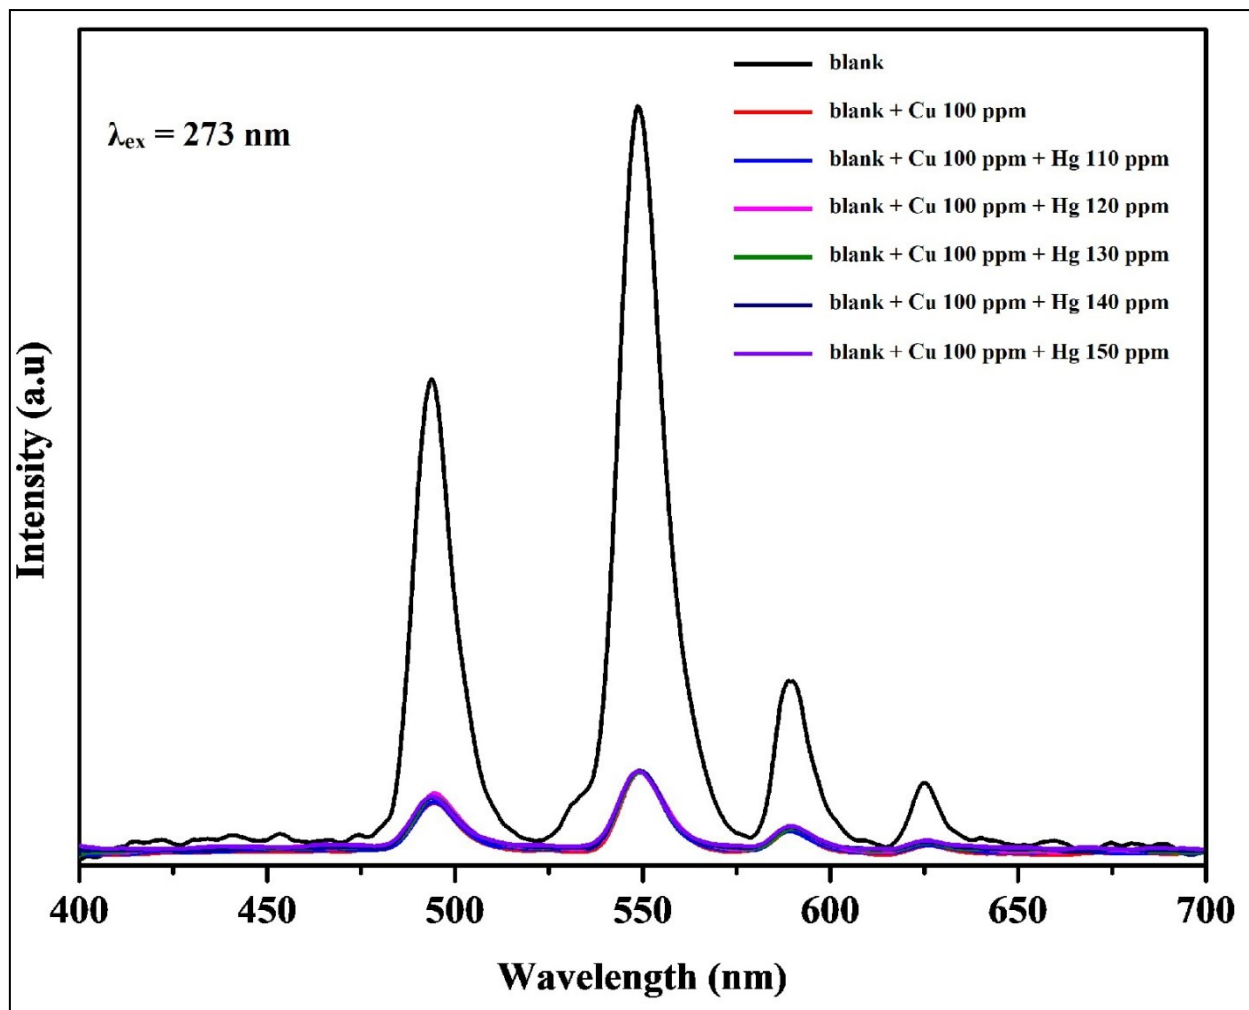

**Fig. S8** Luminescence spectra of Asp-NP after the addition of Cu<sup>2+</sup> ion along with different concentrations of Hg<sup>2+</sup> ion.

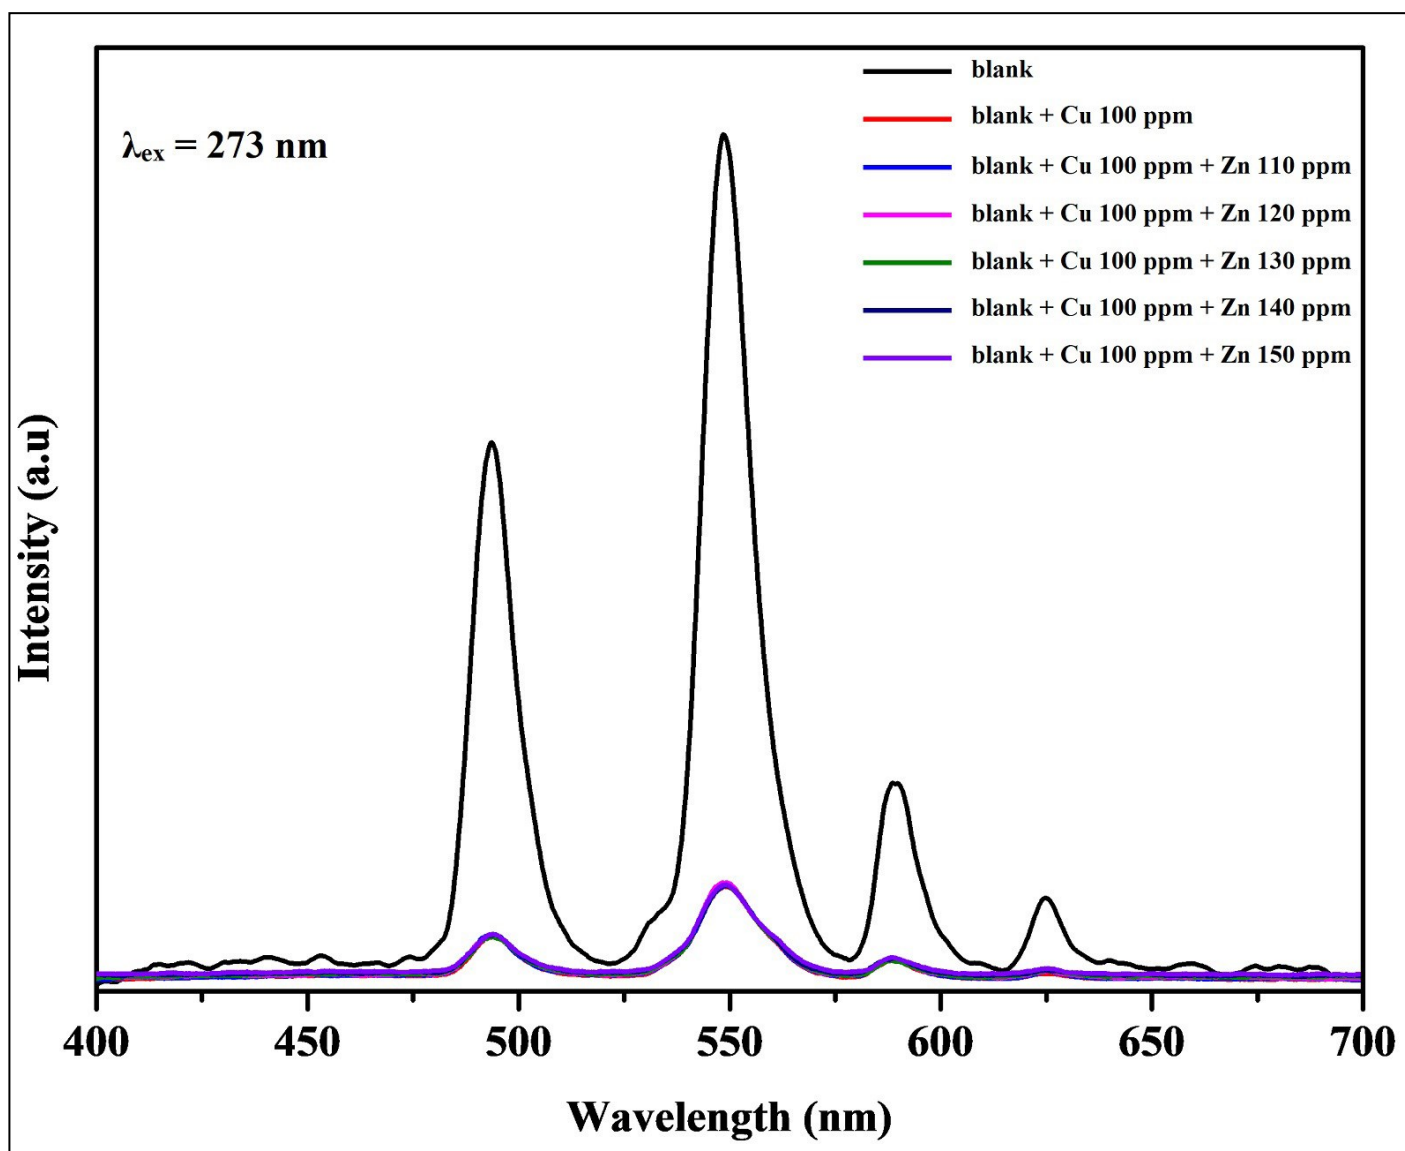

**Fig. S9** Photoluminescence spectra of Asp-NP after the addition of Cu<sup>2+</sup> ion along with different concentrations of Zn<sup>2+</sup> ion.

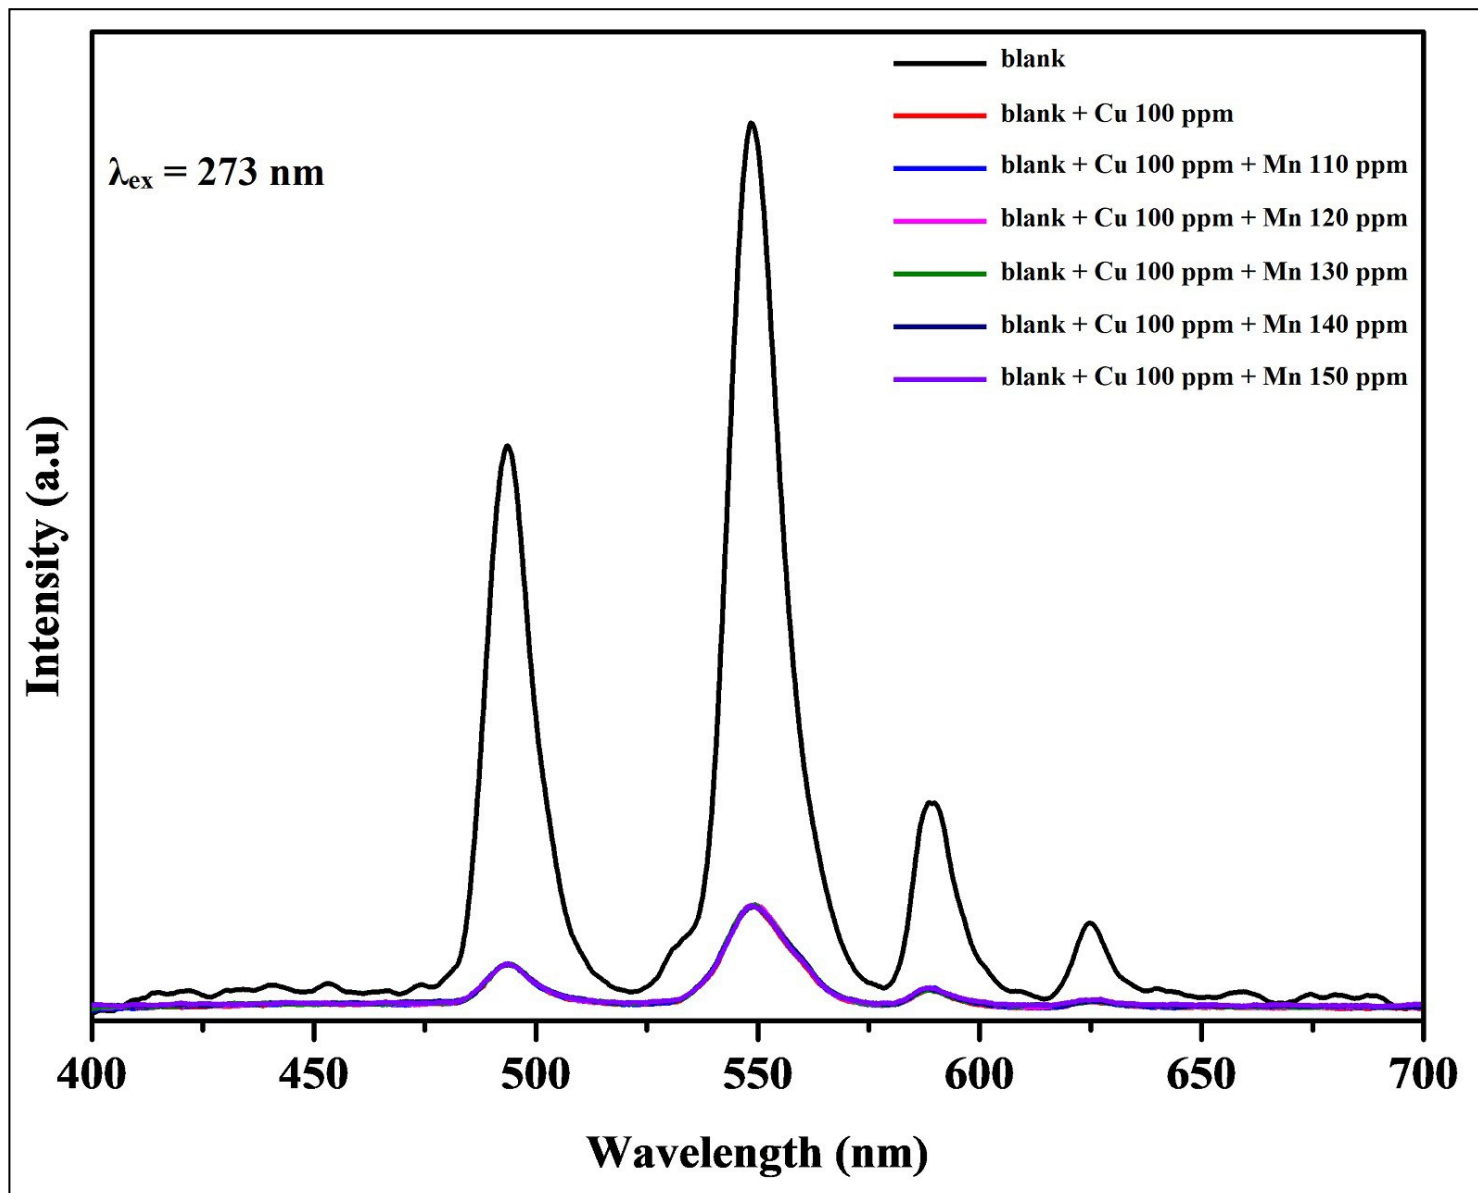

**Fig. S10** Photoluminescence spectra of Asp-NP after the addition of Cu<sup>2+</sup> ion along with different concentrations of Mn<sup>2+</sup> ion.

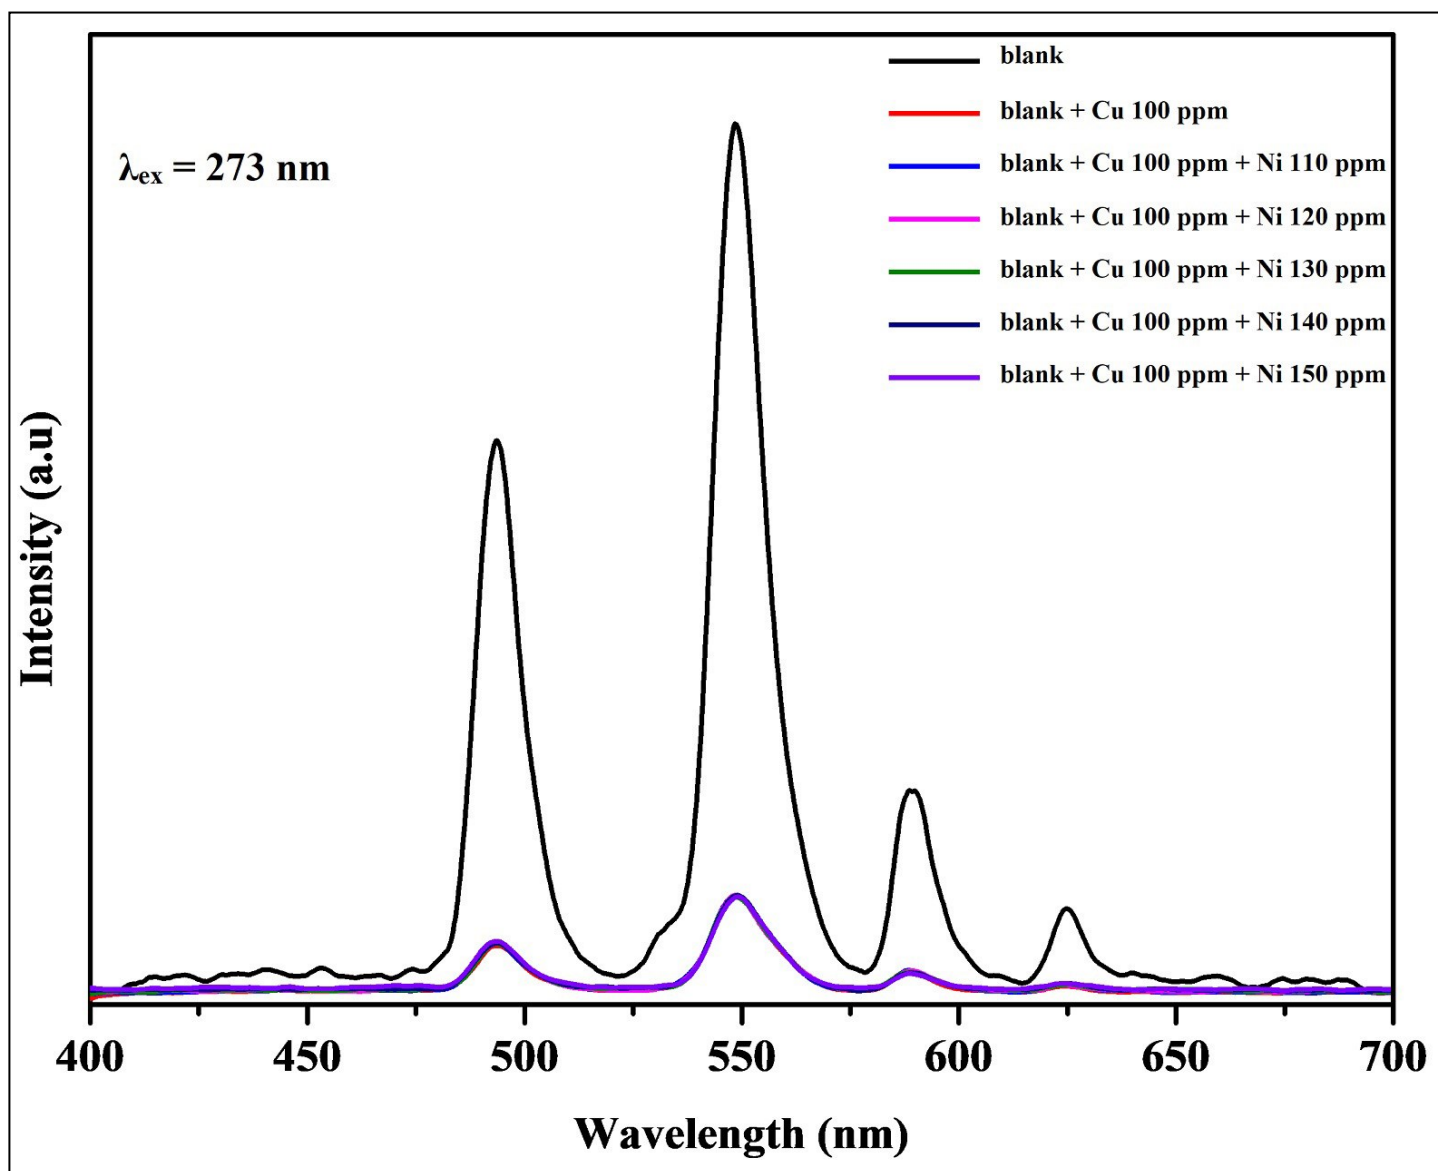

**Fig. S11** Luminescence spectra of Asp-NP after the addition of Cu<sup>2+</sup> ion along with different concentrations of Ni<sup>2+</sup> ion.

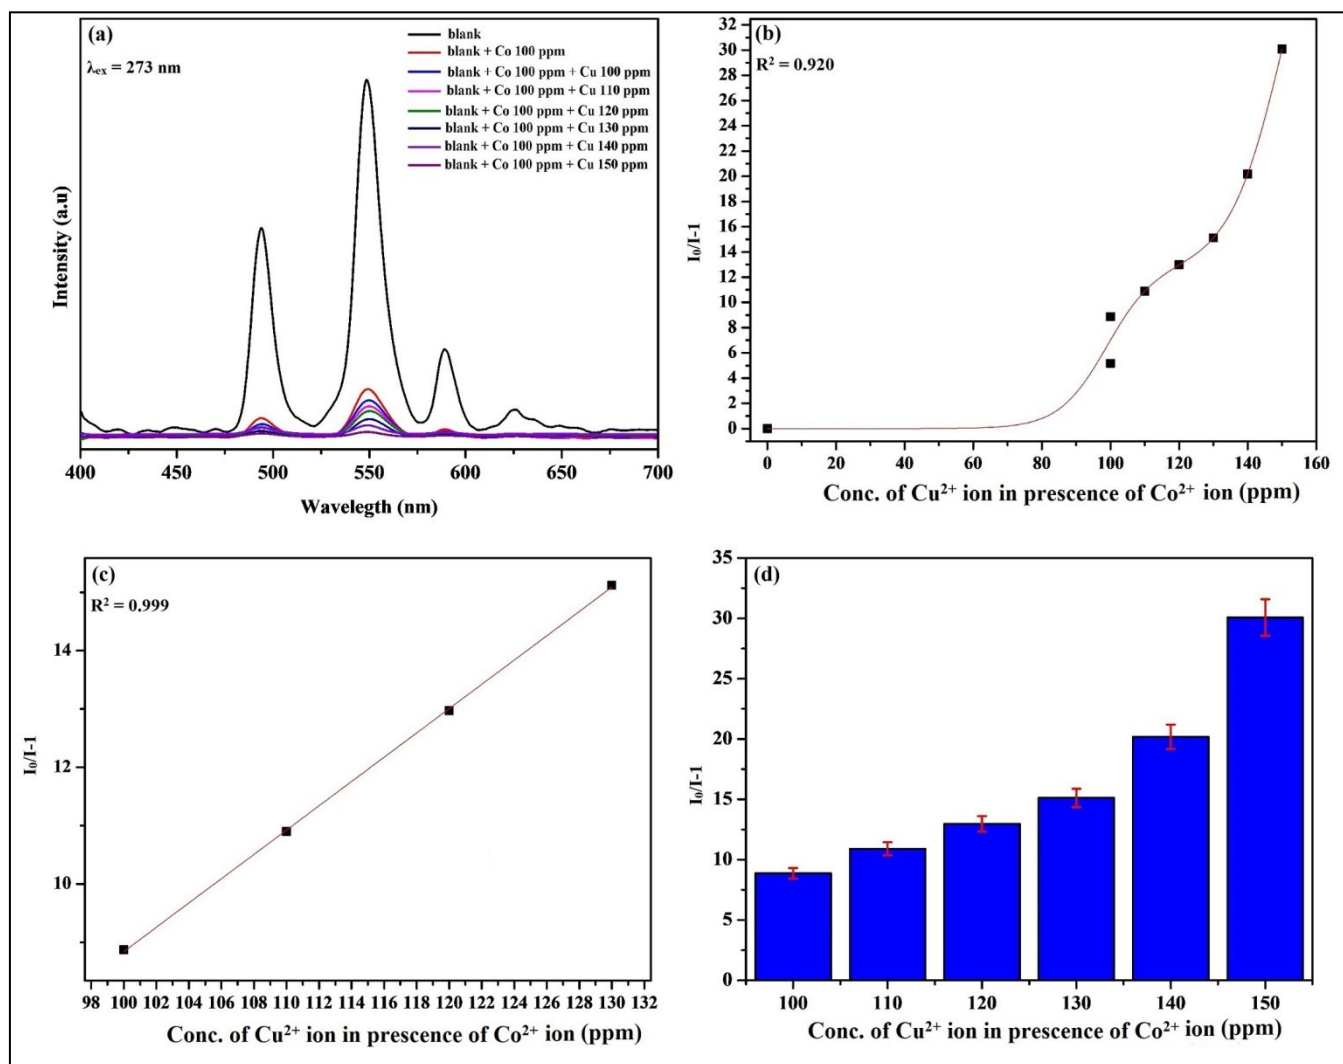

**Fig. S12** (a) Luminescence spectra of Asp-NP after the addition of  $\text{Co}^{2+}$  ion along with different concentrations of  $\text{Cu}^{2+}$  ion (from 100 to 150 ppm), (b) Nonlinear Stern-Volmer plot, (c) linear Stern-Volmer fitting and (d) error bar.
